# Supplementary material for: Morita equivalences from Higgsing toric superpotential algebras
Source: PLOS journal article supplement (doi:10.1371/journal.pcbi.1008596), 2013-01-29
Supplement: S15 (10.1371/journal.pcbi.1008596.s015) [file journal.pcbi.1008596.s015]

**S1 Table** Protein Complexity for Selected Metabolic Pathways

| Pathway                   | OxPhos | TCA | Glycolysis | Pyruvate | OxPPP |
|---------------------------|--------|-----|------------|----------|-------|
| Total # reactions         | 51     | 14  | 24         | 8        | 12    |
| # single-gene reaction    | 19     | 5   | 13         | 1        | 7     |
| # multi-gene reaction     | 1      | 5   | 8          | 5        | 5     |
| # single-complex reaction | 15     | 6   | 3          | 0        | 0     |
| # multi-complex reaction  | 16     | 0   | 0          | 2        | 0     |

Pathway names are shortened for compact display of the table. “OxPhos” stands for oxidative phosphorylation pathway, “Pyruvate” stands for pyruvate metabolism pathway, and “oxPPP” stands for oxidative branch of the pentose phosphate pathway.
